# Supplementary material for: Interactions of vinca alkaloid subunits with chiral amido[4]resorcinarenes: a dynamic, kinetic, and spectroscopic study
Source: Royal Society of Chemistry journal article supplement (doi:10.1039/b900735k), 2009-01-01
Supplement: b900735k.pdf [file b900735k.pdf]

## Interactions of Vinca Alkaloid Subunits with Chiral Amido[4]resorcinarenes: A Dynamic, Kinetic, and Spectroscopic Study.

Bruno Botta,<sup>\*a</sup> Caterina Frascchetti,<sup>a</sup> Francesca R. Novara,<sup>b</sup> Andrea Tafi,<sup>c</sup> Fabiola Sacco,<sup>a</sup> Luisa Mannina,<sup>d,e</sup> Anatoli P. Sobolev,<sup>d</sup> Jochen Mattay,<sup>f</sup> Matthias C. Letzel,<sup>f</sup> and Maurizio Speranza,<sup>\*a</sup>

# *SUPPORTING INFORMATION*

Kinetic plots (**Figures S1-S11**) of the gas-phase reaction between B and [MHA]<sup>+</sup> (A=catharanthine (**C**) or vindoline (**V**); **Figure S12**: [**4<sub>R</sub>**•H•**C**]<sup>+</sup> and [**4<sub>S</sub>**•H•**C**]<sup>+</sup> low-energy structures. **Tables 1S-3S**: NMR assignments. Docking and Molecular Dynamics Simulations: geometries and partial atomic charges.

**Figure S1.** Kinetic plots of the gas-phase reactions between B and  $[1_R \bullet H \bullet C]^+$  (open circles;  $[B]=7.0 \times 10^9$  molecule  $\text{cm}^{-3}$ ) or  $[1_S \bullet H \bullet C]^+$  (full circles;  $[B]=5.9 \times 10^9$  molecule  $\text{cm}^{-3}$ )

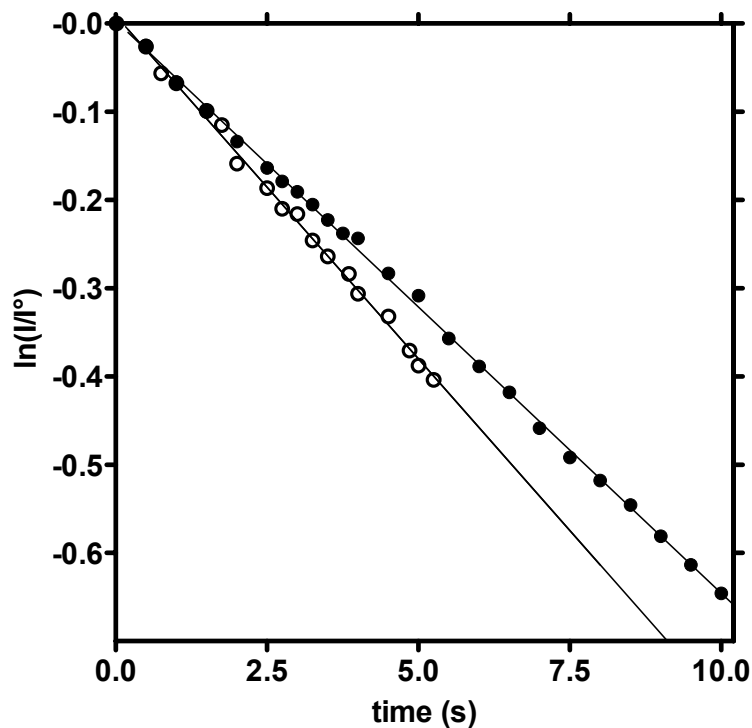

**Figure S2.** Kinetic plots of the gas-phase reactions between B and  $[2_R \bullet H \bullet C]^+$  (open circles;  $[B]=1.4 \times 10^9$  molecule  $\text{cm}^{-3}$ ) or  $[2_S \bullet H \bullet C]^+$  (full circles;  $[B]=1.5 \times 10^9$  molecule  $\text{cm}^{-3}$ )

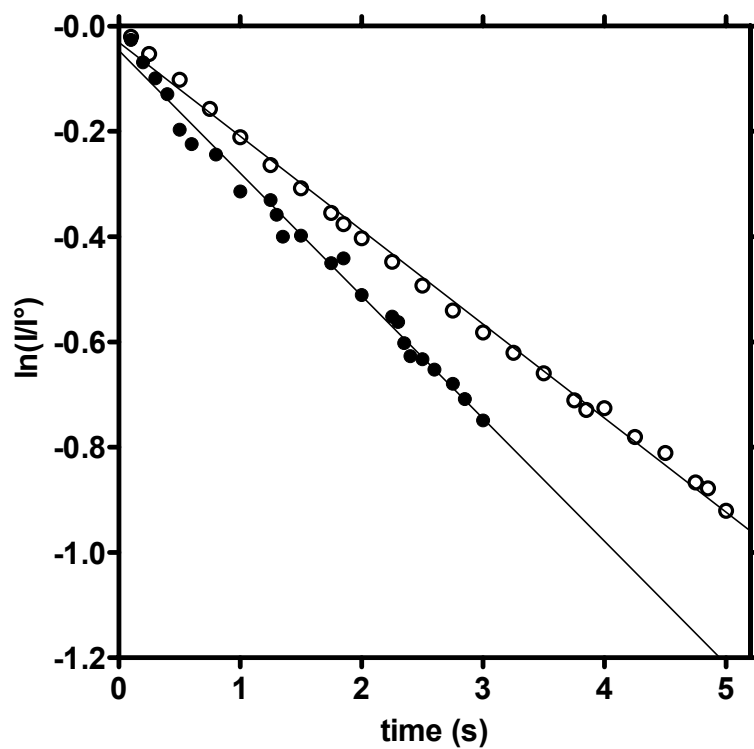

**Figure S3.** Kinetic plots of the gas-phase reactions between B and  $[3_R \bullet H \bullet C]^+$  (open circles;  $[B]=6.4 \times 10^9$  molecule  $\text{cm}^{-3}$ ) or  $[3_S \bullet H \bullet C]^+$  (full circles;  $[B]=7.0 \times 10^9$  molecule  $\text{cm}^{-3}$ )

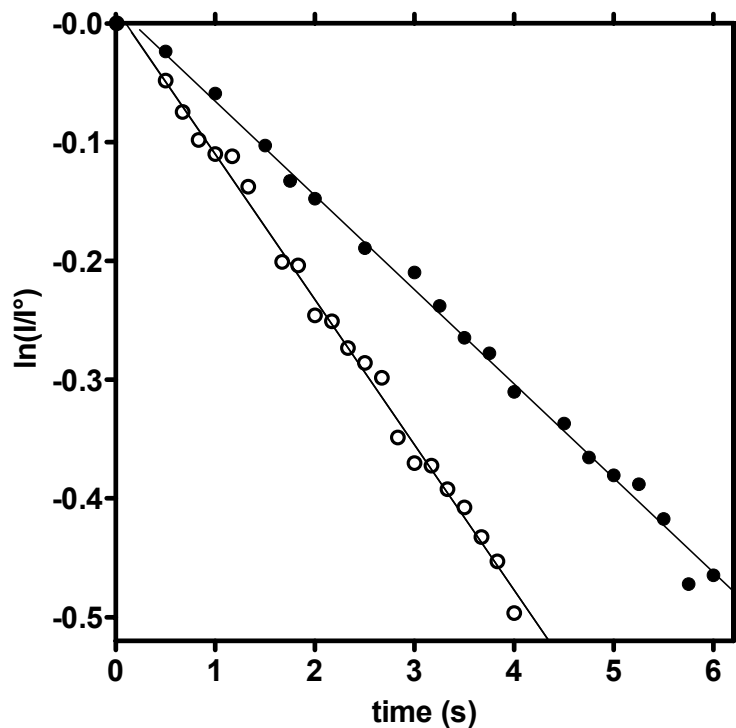

**Figure S4.** Kinetic plots of the gas-phase reactions between B and  $[4_R \bullet H \bullet C]^+$  (open circles;  $[B]=3.1 \times 10^9$  molecule  $\text{cm}^{-3}$ ) or  $[4_S \bullet H \bullet C]^+$  (full circles;  $[B]=3.1 \times 10^9$  molecule  $\text{cm}^{-3}$ )

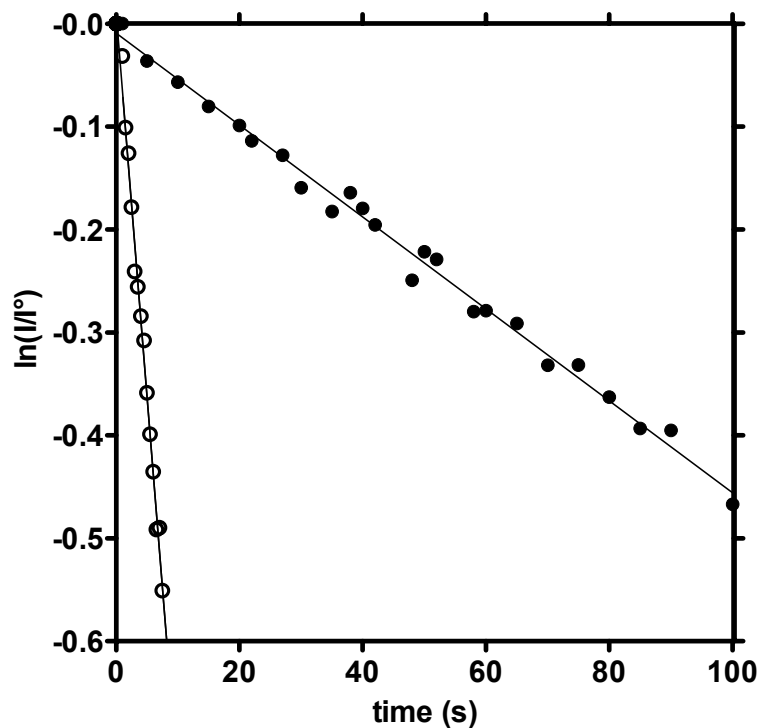

**Figure S5.** Kinetic plots of the gas-phase reactions between B and  $[5_R \bullet H \bullet C]^+$  (open circles;  $[B]=1.2 \times 10^9$  molecule  $\text{cm}^{-3}$ ) or  $[5_S \bullet H \bullet C]^+$  (full circles;  $[B]=2.0 \times 10^9$  molecule  $\text{cm}^{-3}$ )

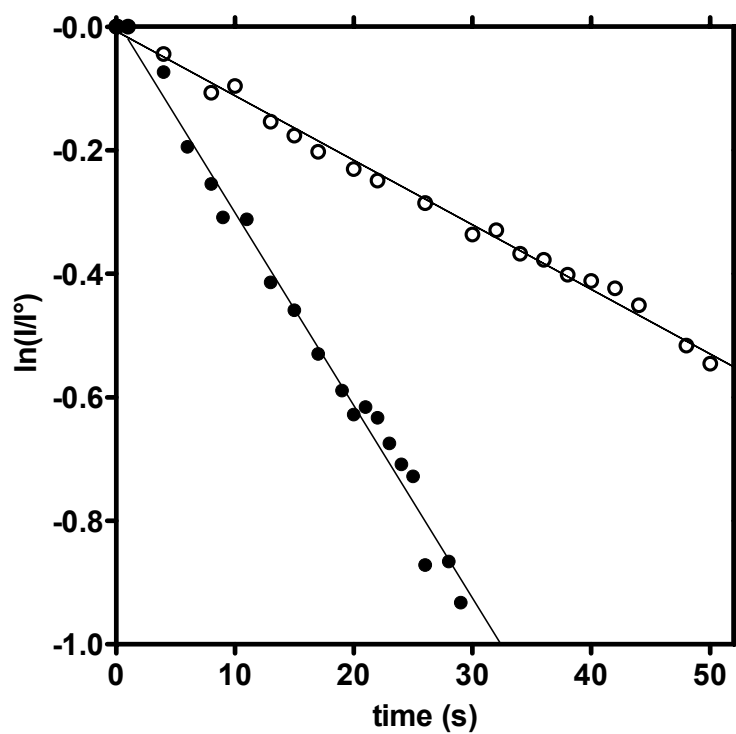

**Figure S6.** Kinetic plots of the gas-phase reactions between B and  $[1_R \bullet H \bullet V]^+$  (open circles;  $[B]=7.8 \times 10^9$  molecule  $\text{cm}^{-3}$ ) or  $[1_S \bullet H \bullet V]^+$  (full circles;  $[B]=7.4 \times 10^9$  molecule  $\text{cm}^{-3}$ )

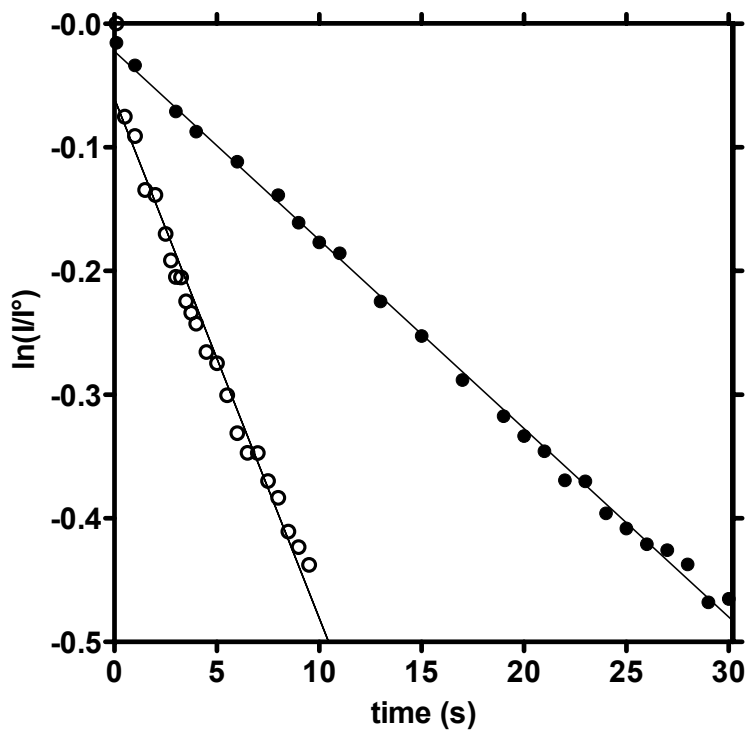

**Figure S7.** Kinetic plots of the gas-phase reactions between B and  $[2_R \bullet H \bullet V]^+$  (open circles;  $[B]=1.8 \times 10^9$  molecule  $\text{cm}^{-3}$ ) or  $[2_S \bullet H \bullet V]^+$  (full circles;  $[B]=1.6 \times 10^9$  molecule  $\text{cm}^{-3}$ )

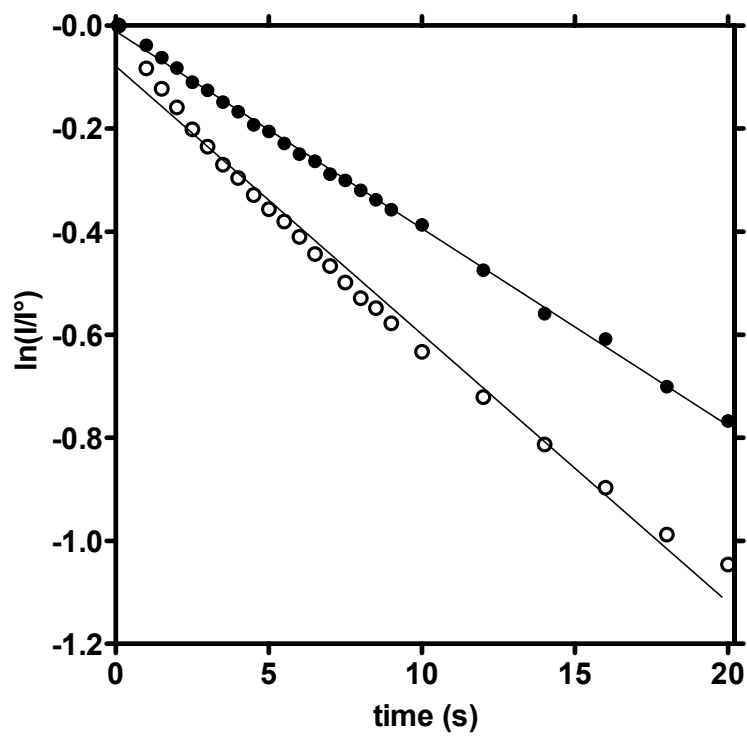

**Figure S8.** Kinetic plots of the gas-phase reactions between B and  $[3_R \bullet H \bullet V]^+$  (open circles;  $[B]=7.5 \times 10^9$  molecule  $\text{cm}^{-3}$ ) or  $[3_S \bullet H \bullet V]^+$  (full circles;  $[B]=7.4 \times 10^9$  molecule  $\text{cm}^{-3}$ )

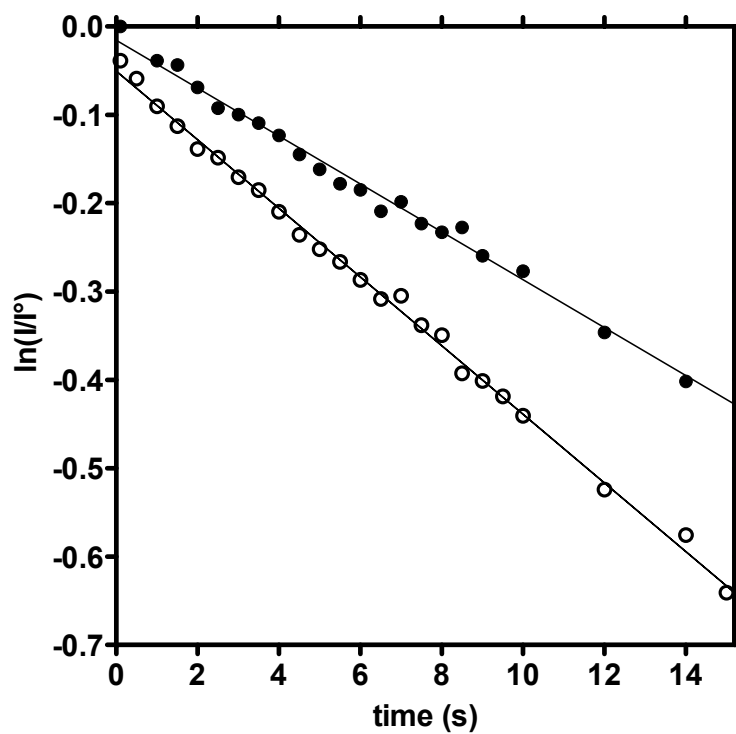

**Figure S9.** Kinetic plots of the gas-phase reactions between B and  $[4_R \bullet H \bullet V]^+$  (open circles;  $[B]=3.3 \times 10^9$  molecule  $\text{cm}^{-3}$ ) or  $[4_S \bullet H \bullet V]^+$  (full circles;  $[B]=3.0 \times 10^9$  molecule  $\text{cm}^{-3}$ )

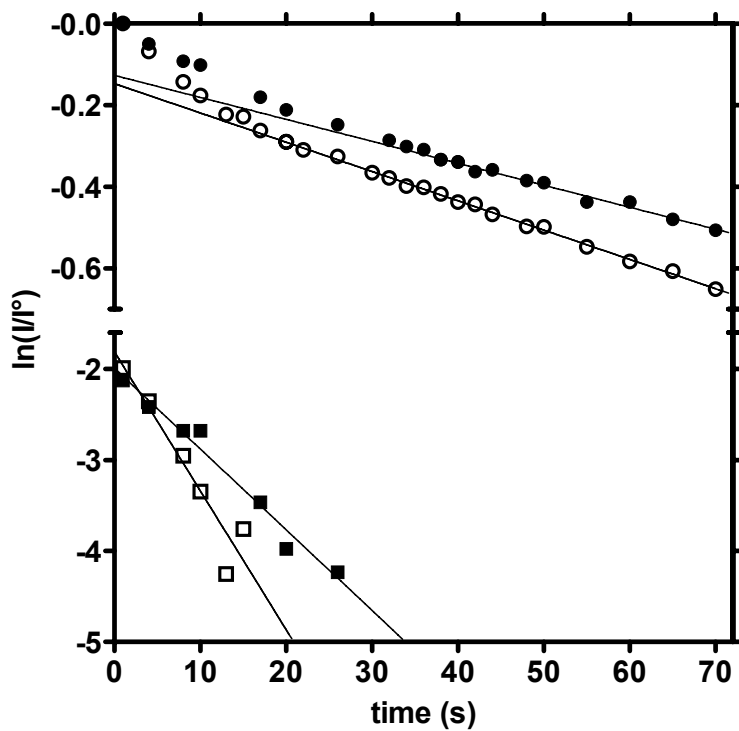



**Figure S10.** Time dependence of the relative abundance of the reactant and products of the gas-phase reaction between B and  $[5_S \bullet H \bullet V]^+$  ( $[B]=2.0 \times 10^9$  molecule  $\text{cm}^{-3}$ )

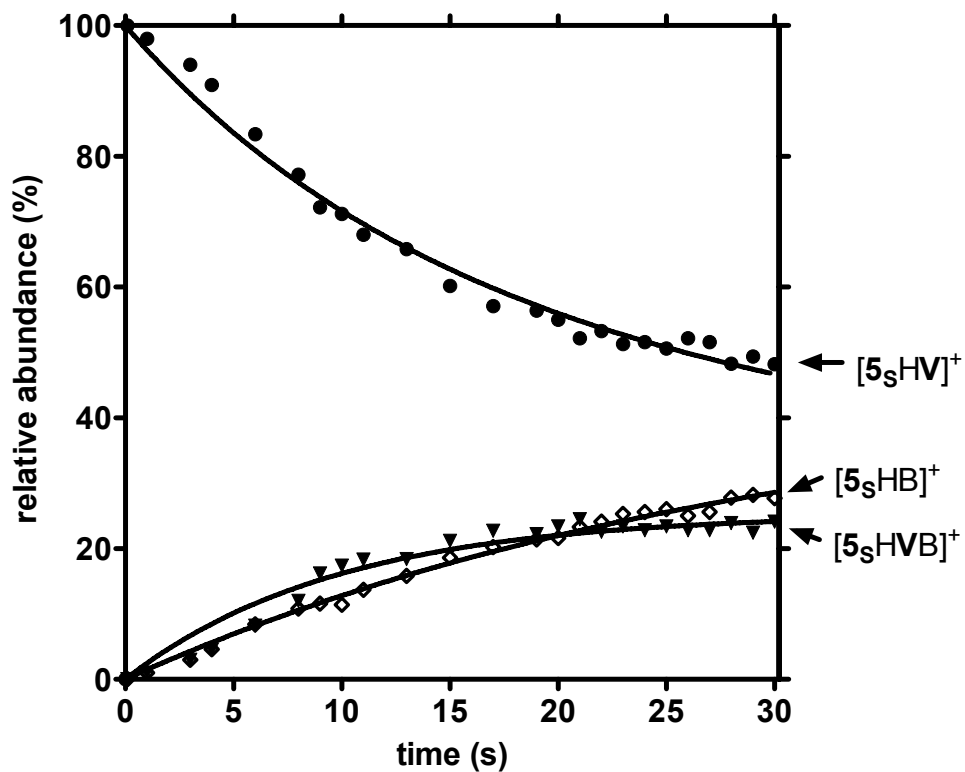

**Figure S11.** Time dependence of the relative abundance of the reactant and products of the gas-phase reaction between B and  $[5_R \bullet H \bullet V]^+$  ( $[B]=1.9 \times 10^9$  molecule  $\text{cm}^{-3}$ )

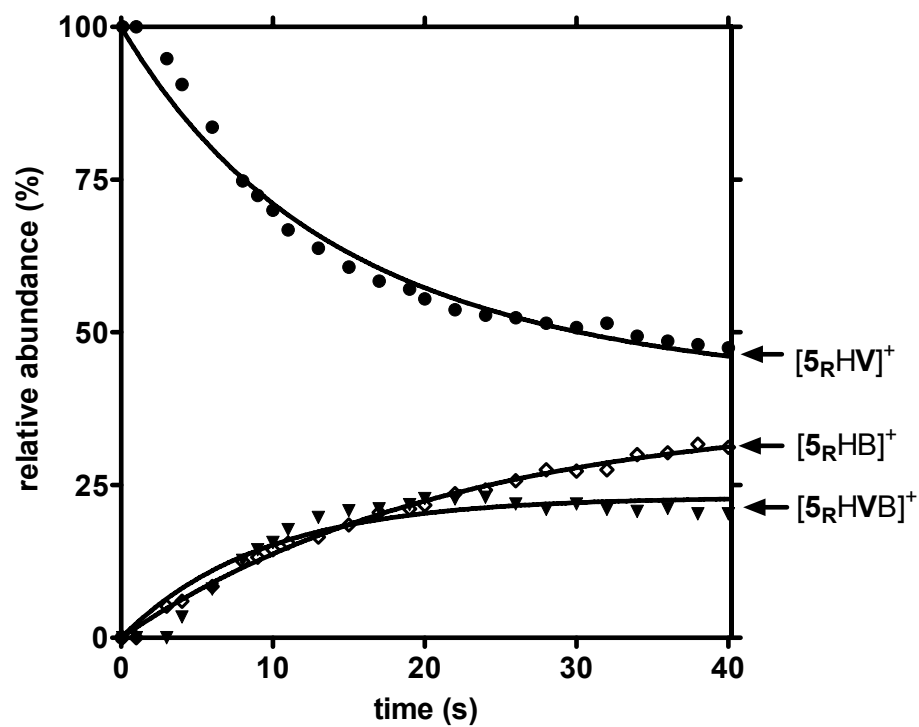

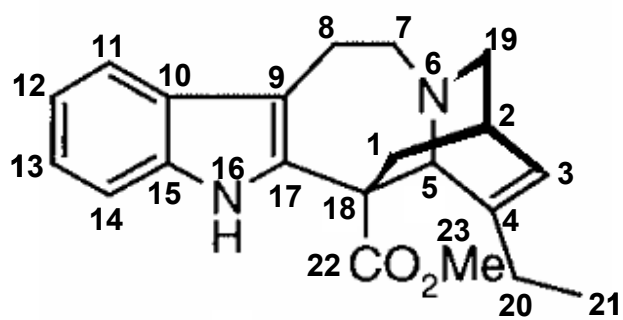

**Table 1S.**  $^1\text{H}$  and  $^{13}\text{C}$  assignments of **C** in  $\text{CD}_2\text{Cl}_2$ .  $^1\text{H}$  and  $^{13}\text{C}$  chemical shifts are reported with respect to the residual proton signal of  $\text{CD}_2\text{Cl}_2$  ( $\delta = 5.33$  ppm) and to the carbon signal of  $\text{CD}_2\text{Cl}_2$  1 at ( $\delta = 54.2$  ppm), respectively.

|    | Type          | $^1\text{H}$ (ppm)      | m          | $J_{\text{H-H}}$ (Hz)            | $^{13}\text{C}$ (ppm) |
|----|---------------|-------------------------|------------|----------------------------------|-----------------------|
| 1  | $\text{CH}_2$ | 1' 1.967<br>1'' 2.891   | dd<br>m    | 13.5, 2.2                        | 37.27                 |
| 2  | CH            | 3.069                   | bs         |                                  | 29.83                 |
| 3  | CH            | 6.264                   | m          |                                  | 128.26                |
| 4  | C             |                         |            |                                  | 146.28                |
| 5  | CH            | 4.769                   | s          |                                  | 60.33                 |
| 7  | $\text{CH}_2$ | 7' 3.470<br>7'' 4.075   | m<br>m     |                                  | 57.06                 |
| 8  | $\text{CH}_2$ | 8' 3.205<br>8'' 3.404   | ddd<br>ddd | 17.5, 8.1, 3.2<br>17.5, 8.8, 3.2 | 20.00                 |
| 10 | C             |                         |            |                                  | 128.40                |
| 11 | CH            | 7.515                   | d          | 8.0                              | 118.99                |
| 12 | CH            | 7.149                   | ddd        | 8.0, 8.0, 1.0                    | 120.99                |
| 13 | CH            | 7.213                   | ddd        | 8.0, 8.2, 1.1                    | 123.81                |
| 14 | CH            | 7.320                   | ddd        | 8.2, 0.8, 0.8                    | 111.70                |
| 15 | C             |                         |            |                                  | 136.13                |
| 16 | NH            | 8.000                   | s          |                                  |                       |
| 18 | C             |                         |            |                                  | 51.73                 |
| 19 | $\text{CH}_2$ | 19' 2.891<br>19'' 3.400 | m<br>m     |                                  | 53.21                 |
| 20 | $\text{CH}_2$ | 20' 2.210<br>20'' 2.751 | ddq<br>ddq | 17.2, 2.2, 7.3<br>17.2, 2.2, 7.3 | 27.53                 |
| 21 | $\text{CH}_3$ | 1.137                   | t          | 7.3                              | 10.5                  |
| 22 | CO            |                         |            |                                  | 172.24                |
| 23 | $\text{CH}_3$ | 3.775                   |            |                                  | 54.09                 |

**Table 2S.** Assignment of C in D<sub>2</sub>O at pH = 10.8. <sup>1</sup>H and <sup>13</sup>C chemical shifts are reported with respect to methyl signal of ethanol at 1.131 ppm and 17.1 ppm, respectively.

|    | Type            | <sup>1</sup> H (ppm)    | m          | J <sub>H-H</sub> (Hz)             | <sup>13</sup> C (ppm) |
|----|-----------------|-------------------------|------------|-----------------------------------|-----------------------|
| 1  | CH <sub>2</sub> | 1' 1.689<br>1'' 2.646   | dd<br>ddd  | 13.5, 2.2<br>13.5, 2.2, 2.8       | 36.7                  |
| 2  | CH              | 2.77                    | bs         |                                   | 30.2                  |
| 3  | CH              | 5.976                   | m          |                                   | 125.04                |
| 5  | CH              | 4.062                   | s          |                                   | 62.20                 |
| 7  | CH <sub>2</sub> | 7' 3.179<br>7'' 3.361   | ddd<br>ddd | 13.3, 8.2, 3.6<br>13.3, 10.1, 3.1 | 52.30                 |
| 8  | CH <sub>2</sub> | 8' 2.958<br>8'' 3.256   | ddd<br>ddd | 16.9, 8.2, 3.9<br>16.9, 10.1, 4.3 |                       |
| 11 | CH              | 7.559                   | d          | 8.0                               | 118.15                |
| 12 | CH              | 7.118                   | ddd        | 8.0, 8.0, 1.0                     | 119.87                |
| 13 | CH              | 7.175                   | ddd        | 8.8, 8.2, 1.1                     | 122.28                |
| 14 | CH              | 7.325                   | ddd        | 8.2, 0.8, 0.8                     | 11.28                 |
| 19 | CH <sub>2</sub> | 19' 2.612<br>19'' 2.826 | ddd<br>bd  | 9.4, 2.8, 2.8<br>9.4              | 48.80                 |
| 20 | CH <sub>2</sub> | 20' 1.968<br>20'' 2.162 | ddq<br>ddq | 17.1, 2.2, 7.3<br>17.1, 2.2, 7.3  | 32.2                  |
| 21 | CH <sub>3</sub> | 0.98                    | t          | 7.4                               | 10.0                  |
| 23 | CH <sub>3</sub> | 3.719                   | s          |                                   | 53.30                 |

**Table 3S.**  $^1\text{H}$  Assignment of **C** in  $\text{D}_2\text{O}$  at  $\text{pH} = 5.4$ .  $^1\text{H}$  Chemical shifts are reported with respect to methyl signal of ethanol at 1.131 ppm.

|    | Type          | $^1\text{H}$ (ppm)      | m          | $J_{\text{H-H}}$ (Hz)            |
|----|---------------|-------------------------|------------|----------------------------------|
| 1  | $\text{CH}_2$ | 1' 1.990<br>1'' 2.798   | dd         | 13.7, 2.1                        |
| 2  | CH            | 3.13                    | bs         |                                  |
| 3  | CH            | 6.366                   | m          |                                  |
| 5  | CH            | 4.967                   | s          |                                  |
| 7  | $\text{CH}_2$ | 7' 3.600<br>7'' 3.929   | m<br>ddd   | 13.3, 8.2, 3.6                   |
| 8  | $\text{CH}_2$ | 8' 3.28<br>8'' 3.42     | ddd<br>ddd | 17.6, 8.6, 3.7<br>17.6, 8.6, 3.7 |
| 11 | CH            | 7.588                   | ddd        | 8.0, 0.8, 0.8                    |
| 12 | CH            | 7.162                   | ddd        | 8.0, 8.0, 0.8                    |
| 13 | CH            | 7.233                   | ddd        | 8.0, 8.2, 0.8                    |
| 14 | CH            | 7.374                   | ddd        | 8.2, 0.8, 0.8                    |
| 19 | $\text{CH}_2$ | 3.207                   | m          |                                  |
| 20 | $\text{CH}_2$ | 20' 2.105<br>20'' 2.283 | ddq<br>ddq | 17.5, 2.1, 7.4                   |
| 21 | $\text{CH}_3$ | 1.029                   | t          | 7.4                              |
| 23 | $\text{CH}_3$ | 3.720                   | s          |                                  |

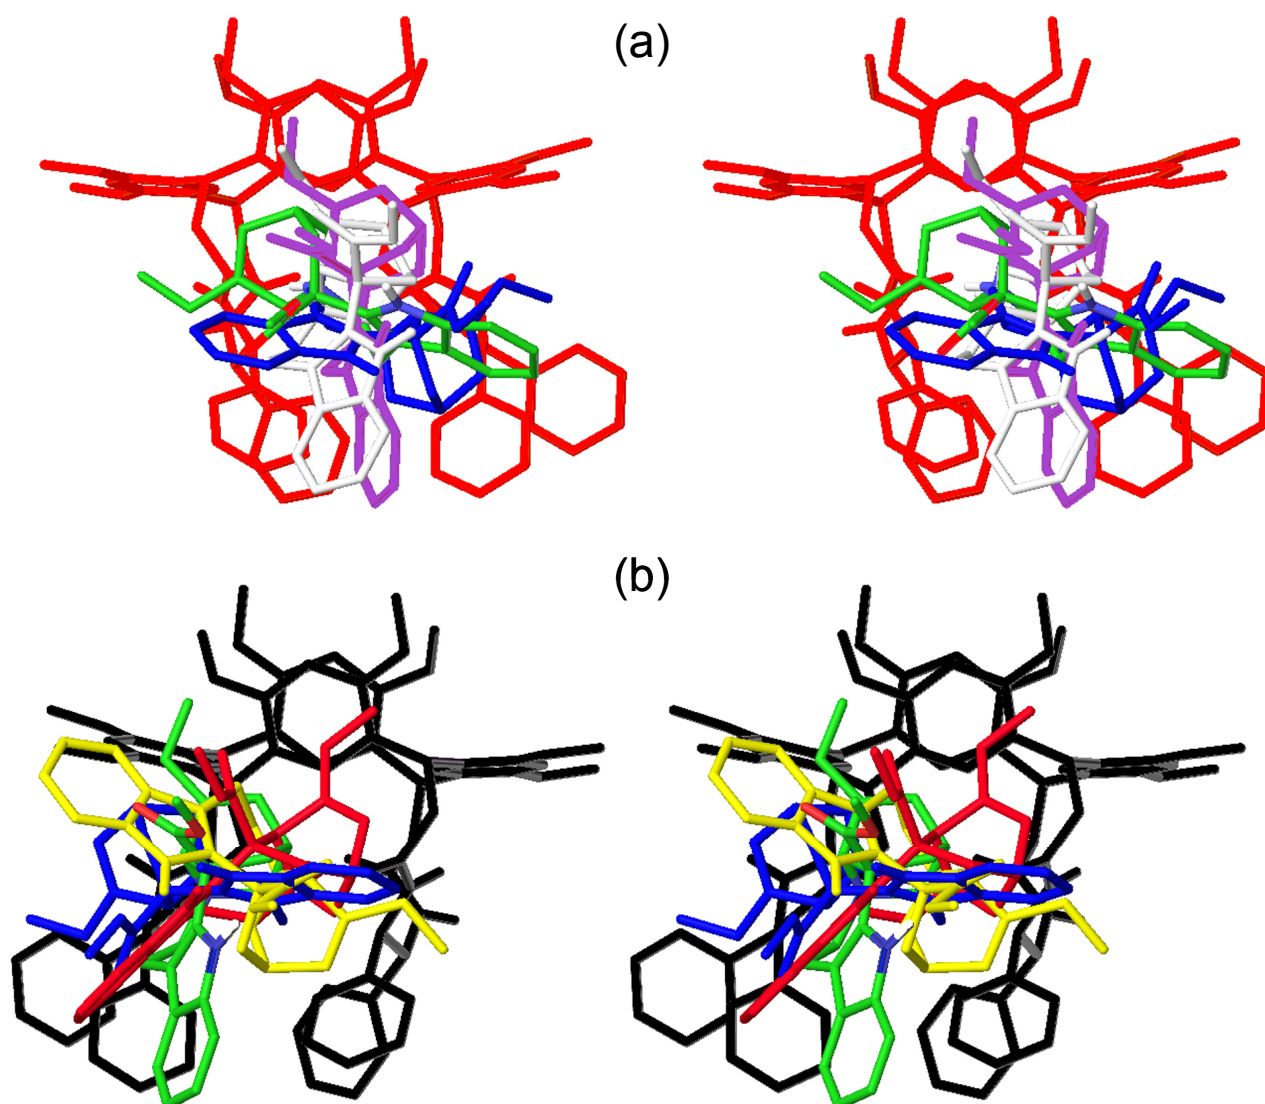

**Figure S12.** Tangles showing representative orientations of catharanthine in populated low-energy (a)  $[4_S \cdot H \cdot C]^+$  (violet, white, and blue) and (b)  $[4_R \cdot H \cdot C]^+$  (yellow, red, and blue) complexes superimposed to the corresponding global minimum complex (green) shown in Figure 4 (crossed stereo view).

Cartesian coordinates and charges of 4<sub>s</sub> (mol2 format).

#Name: 4<sub>s</sub>

@<TRIPOS>MOLECULE

amido[4]resorcinarene 4<sub>s</sub>

160 170 1

SMALL

NO\_CHARGES

@<TRIPOS>ATOM

|    |   |         |        |         |      |   |     |         |
|----|---|---------|--------|---------|------|---|-----|---------|
| 1  | C | 2.3711  | 6.4675 | 7.0410  | C.ar | 1 | RES | -0.0520 |
| 2  | C | 1.0822  | 6.1766 | 7.5341  | C.ar | 1 | RES | 0.0342  |
| 3  | C | 0.1067  | 5.6965 | 6.6379  | C.ar | 1 | RES | -0.1304 |
| 4  | C | 0.4430  | 5.5123 | 5.2844  | C.ar | 1 | RES | -0.0677 |
| 5  | C | 1.7367  | 5.7678 | 4.7968  | C.ar | 1 | RES | -0.1303 |
| 6  | C | 2.7144  | 6.2642 | 5.6870  | C.ar | 1 | RES | 0.0342  |
| 7  | O | 0.7430  | 6.3308 | 8.8581  | O.3  | 1 | RES | -0.1970 |
| 8  | C | -1.2949 | 5.3368 | 7.1225  | C.3  | 1 | RES | 0.1928  |
| 9  | C | 2.0995  | 5.4970 | 3.3376  | C.3  | 1 | RES | 0.1928  |
| 10 | O | 3.9756  | 6.5228 | 5.2022  | O.3  | 1 | RES | -0.1971 |
| 11 | C | 1.6784  | 6.9018 | 9.7792  | C.3  | 1 | RES | -0.0488 |
| 12 | C | 4.9828  | 7.0721 | 6.0583  | C.3  | 1 | RES | -0.0487 |
| 13 | C | -3.4317 | 7.7066 | 4.9883  | C.ar | 1 | RES | -0.1489 |
| 14 | C | -2.4309 | 7.2381 | 5.8655  | C.ar | 1 | RES | 0.1003  |
| 15 | C | -2.3845 | 5.8632 | 6.1843  | C.ar | 1 | RES | -0.0436 |
| 16 | C | -3.3614 | 5.0075 | 5.6376  | C.ar | 1 | RES | -0.2435 |
| 17 | C | -4.3703 | 5.4744 | 4.7770  | C.ar | 1 | RES | 0.0024  |
| 18 | C | -4.3993 | 6.8427 | 4.4341  | C.ar | 1 | RES | 0.0311  |
| 19 | O | -1.4974 | 8.0779 | 6.4267  | O.3  | 1 | RES | -0.1893 |
| 20 | C | -5.4020 | 4.5139 | 4.1863  | C.3  | 1 | RES | 0.1831  |
| 21 | O | -5.3694 | 7.2832 | 3.5640  | O.3  | 1 | RES | -0.1750 |
| 22 | C | -1.3596 | 9.4196 | 5.9489  | C.3  | 1 | RES | -0.0979 |
| 23 | C | -5.3369 | 8.6275 | 3.0747  | C.3  | 1 | RES | -0.1273 |
| 24 | C | -5.6254 | 3.6745 | 0.4508  | C.ar | 1 | RES | -0.0489 |
| 25 | C | -6.0199 | 3.9800 | 1.7715  | C.ar | 1 | RES | 0.0283  |
| 26 | C | -5.0258 | 4.1623 | 2.7535  | C.ar | 1 | RES | -0.1269 |
| 27 | C | -3.6740 | 3.9955 | 2.4019  | C.ar | 1 | RES | -0.0520 |
| 28 | C | -3.2845 | 3.6608 | 1.0980  | C.ar | 1 | RES | -0.1268 |
| 29 | C | -4.2683 | 3.5122 | 0.0983  | C.ar | 1 | RES | 0.0282  |
| 30 | O | -7.3382 | 4.0940 | 2.1462  | O.3  | 1 | RES | -0.1953 |
| 31 | C | -1.8105 | 3.3874 | 0.8228  | C.3  | 1 | RES | 0.1832  |
| 32 | O | -3.8712 | 3.1952 | -1.1788 | O.3  | 1 | RES | -0.1953 |
| 33 | C | -8.3755 | 3.9565 | 1.1692  | C.3  | 1 | RES | -0.0508 |
| 34 | C | -4.8363 | 2.8032 | -2.1585 | C.3  | 1 | RES | -0.0508 |
| 35 | C | -0.3297 | 6.9385 | 0.7034  | C.ar | 1 | RES | -0.1488 |
| 36 | C | 0.7133  | 6.8715 | 1.6565  | C.ar | 1 | RES | 0.1003  |
| 37 | C | 0.9329  | 5.6573 | 2.3458  | C.ar | 1 | RES | -0.0435 |
| 38 | C | 0.0608  | 4.5834 | 2.0897  | C.ar | 1 | RES | -0.2436 |
| 39 | C | -0.9572 | 4.6272 | 1.1198  | C.ar | 1 | RES | 0.0025  |
| 40 | C | -1.1549 | 5.8292 | 0.4106  | C.ar | 1 | RES | 0.0311  |
| 41 | O | 1.5216  | 7.9502 | 1.9341  | O.3  | 1 | RES | -0.1893 |
| 42 | O | -2.1446 | 5.8721 | -0.5427 | O.3  | 1 | RES | -0.1750 |
| 43 | C | 1.3426  | 9.1859 | 1.2340  | C.3  | 1 | RES | -0.0979 |
| 44 | C | -2.3844 | 7.0732 | -1.2811 | C.3  | 1 | RES | -0.1273 |
| 45 | H | -6.3776 | 3.5508 | -0.3085 | H    | 1 | RES | 0.0771  |
| 46 | H | -2.8992 | 4.0926 | 3.1483  | H    | 1 | RES | 0.1141  |
| 47 | H | -0.3206 | 5.1410 | 4.6188  | H    | 1 | RES | 0.1227  |
| 48 | H | 3.1182  | 6.8391 | 7.7202  | H    | 1 | RES | 0.0742  |
| 49 | H | -0.4931 | 7.8580 | 0.1716  | H    | 1 | RES | 0.1046  |
| 50 | H | 0.1845  | 3.6870 | 2.6535  | H    | 1 | RES | 0.1677  |
| 51 | H | -3.3358 | 3.9552 | 5.8552  | H    | 1 | RES | 0.1677  |
| 52 | H | -3.4622 | 8.7527 | 4.7426  | H    | 1 | RES | 0.1047  |
| 53 | H | -1.4951 | 5.8838 | 8.0441  | H    | 1 | RES | 0.0003  |
| 54 | H | 2.7887  | 6.2971 | 3.0742  | H    | 1 | RES | 0.0003  |
| 55 | H | 1.9711  | 7.9023 | 9.4580  | H    | 1 | RES | 0.0740  |
| 56 | H | 2.5557  | 6.2627 | 9.8843  | H    | 1 | RES | 0.0740  |
| 57 | H | 1.1933  | 6.9825 | 10.7520 | H    | 1 | RES | 0.0740  |
| 58 | H | 5.8851  | 7.2263 | 5.4665  | H    | 1 | RES | 0.0740  |
| 59 | H | 4.6649  | 8.0365 | 6.4566  | H    | 1 | RES | 0.0740  |
| 60 | H | 5.2180  | 6.3820 | 6.8693  | H    | 1 | RES | 0.0740  |



|       |         |         |             |       |         |
|-------|---------|---------|-------------|-------|---------|
| 61 H  | -6.3170 | 5.1053  | 4.1501 H    | 1 RES | 0.0062  |
| 62 H  | -0.4872 | 9.8621  | 6.4290 H    | 1 RES | 0.0836  |
| 63 H  | -2.2364 | 10.0128 | 6.2097 H    | 1 RES | 0.0836  |
| 64 H  | -1.1981 | 9.4259  | 4.8699 H    | 1 RES | 0.0836  |
| 65 H  | -5.5119 | 9.3358  | 3.8850 H    | 1 RES | 0.0932  |
| 66 H  | -6.1334 | 8.7405  | 2.3394 H    | 1 RES | 0.0932  |
| 67 H  | -4.3843 | 8.8322  | 2.5842 H    | 1 RES | 0.0932  |
| 68 H  | -1.6662 | 3.1893  | -0.2388 H   | 1 RES | 0.0062  |
| 69 H  | -8.2716 | 4.7141  | 0.3912 H    | 1 RES | 0.0740  |
| 70 H  | -9.3346 | 4.1040  | 1.6654 H    | 1 RES | 0.0740  |
| 71 H  | -8.3643 | 2.9576  | 0.7315 H    | 1 RES | 0.0740  |
| 72 H  | -5.4272 | 1.9610  | -1.7966 H   | 1 RES | 0.0740  |
| 73 H  | -4.2987 | 2.4854  | -3.0517 H   | 1 RES | 0.0740  |
| 74 H  | -5.4806 | 3.6420  | -2.4220 H   | 1 RES | 0.0740  |
| 75 H  | 0.3523  | 9.5982  | 1.4300 H    | 1 RES | 0.0835  |
| 76 H  | 1.4940  | 9.0449  | 0.1630 H    | 1 RES | 0.0835  |
| 77 H  | 2.0883  | 9.8934  | 1.5960 H    | 1 RES | 0.0835  |
| 78 H  | -2.6784 | 7.8814  | -0.6111 H   | 1 RES | 0.0932  |
| 79 H  | -3.2035 | 6.8832  | -1.9742 H   | 1 RES | 0.0932  |
| 80 H  | -1.5014 | 7.3509  | -1.8575 H   | 1 RES | 0.0932  |
| 81 C  | 2.3550  | 2.8863  | 3.3145 C.2  | 1 RES | 0.4622  |
| 82 O  | 2.2050  | 2.1837  | 2.3192 O.2  | 1 RES | -0.5509 |
| 83 C  | 3.0078  | 4.2587  | 3.1529 C.3  | 1 RES | -0.1508 |
| 84 C  | -0.7337 | 2.9076  | 6.5085 C.2  | 1 RES | 0.4816  |
| 85 O  | -1.1692 | 2.8398  | 5.3618 O.2  | 1 RES | -0.5321 |
| 86 C  | -1.3558 | 3.8575  | 7.5368 C.3  | 1 RES | -0.1583 |
| 87 N  | 1.9395  | 2.4985  | 4.5302 N.am | 1 RES | -0.2594 |
| 88 N  | 0.3030  | 2.1754  | 6.9351 N.am | 1 RES | -0.3848 |
| 89 C  | 0.9313  | 1.0384  | 6.2655 C.3  | 1 RES | -0.0372 |
| 90 C  | -1.2413 | -2.6229 | 7.1936 C.ar | 1 RES | -0.1108 |
| 91 C  | -1.9315 | -1.5049 | 6.7004 C.ar | 1 RES | -0.2107 |
| 92 C  | -1.2348 | -0.3241 | 6.3906 C.ar | 1 RES | -0.0351 |
| 93 C  | 0.1601  | -0.2358 | 6.5860 C.ar | 1 RES | -0.0117 |
| 94 C  | 0.8409  | -1.3665 | 7.0819 C.ar | 1 RES | -0.1216 |
| 95 C  | 0.1482  | -2.5524 | 7.3815 C.ar | 1 RES | -0.1830 |
| 96 H  | -1.7763 | -3.5344 | 7.4210 H    | 1 RES | 0.1372  |
| 97 H  | -3.0000 | -1.5485 | 6.5451 H    | 1 RES | 0.1458  |
| 98 H  | -1.7937 | 0.5102  | 5.9937 H    | 1 RES | 0.1442  |
| 99 H  | 1.9113  | -1.3373 | 7.2236 H    | 1 RES | 0.1161  |
| 100 H | 0.6874  | -3.4127 | 7.7520 H    | 1 RES | 0.1467  |
| 101 H | 0.5881  | 2.3277  | 7.8900 H    | 1 RES | 0.2917  |
| 102 H | 3.8474  | 4.3134  | 3.8445 H    | 1 RES | 0.0501  |
| 103 H | 3.4164  | 4.3049  | 2.1424 H    | 1 RES | 0.0501  |
| 104 H | -0.7943 | 3.7730  | 8.4673 H    | 1 RES | 0.0581  |
| 105 H | 1.9086  | 0.9389  | 6.7381 H    | 1 RES | 0.1190  |
| 106 H | -2.3770 | 3.5531  | 7.7627 H    | 1 RES | 0.0581  |
| 107 C | 1.2162  | 1.2454  | 4.7648 C.3  | 1 RES | -0.0371 |
| 108 C | 3.2515  | -2.2410 | 3.1397 C.ar | 1 RES | -0.1297 |
| 109 C | 3.9396  | -1.3567 | 3.9873 C.ar | 1 RES | -0.1850 |
| 110 C | 3.2859  | -0.2231 | 4.5019 C.ar | 1 RES | -0.0429 |
| 111 C | 1.9393  | 0.0395  | 4.1798 C.ar | 1 RES | 0.0344  |
| 112 C | 1.2624  | -0.8508 | 3.3221 C.ar | 1 RES | -0.0817 |
| 113 C | 1.9113  | -1.9852 | 2.8067 C.ar | 1 RES | -0.1903 |
| 114 H | 3.7519  | -3.1101 | 2.7367 H    | 1 RES | 0.1356  |
| 115 H | 4.9734  | -1.5439 | 4.2379 H    | 1 RES | 0.1417  |
| 116 H | 3.8251  | 0.4518  | 5.1486 H    | 1 RES | 0.0989  |
| 117 H | 0.2332  | -0.6680 | 3.0511 H    | 1 RES | 0.0747  |
| 118 H | 1.3739  | -2.6523 | 2.1471 H    | 1 RES | 0.1434  |
| 119 H | 2.0096  | 3.1510  | 5.2960 H    | 1 RES | 0.2327  |
| 120 H | 0.2715  | 1.3217  | 4.2273 H    | 1 RES | 0.1560  |
| 121 C | -2.3831 | 0.9706  | 1.3519 C.2  | 1 RES | 0.4622  |
| 122 O | -2.5500 | 0.4315  | 0.2591 O.2  | 1 RES | -0.5509 |
| 123 C | -1.3707 | 2.0930  | 1.5320 C.3  | 1 RES | -0.1508 |
| 124 C | -5.0574 | 2.0032  | 4.7888 C.2  | 1 RES | 0.4816  |
| 125 O | -4.1525 | 1.6477  | 5.5399 O.2  | 1 RES | -0.5321 |
| 126 C | -5.8180 | 3.3058  | 5.0478 C.3  | 1 RES | -0.1583 |
| 127 N | -3.1011 | 0.6462  | 2.4322 N.am | 1 RES | -0.2594 |
| 128 N | -5.4683 | 1.2458  | 3.7643 N.am | 1 RES | -0.3848 |
| 129 C | -5.0997 | -0.1578 | 3.5899 C.3  | 1 RES | -0.0372 |
| 130 C | -8.7569 | -2.4725 | 3.2144 C.ar | 1 RES | -0.1108 |
| 131 C | -7.8455 | -2.7565 | 4.2447 C.ar | 1 RES | -0.2107 |
| 132 C | -6.6630 | -2.0059 | 4.3667 C.ar | 1 RES | -0.0351 |
| 133 C | -6.3783 | -0.9638 | 3.4627 C.ar | 1 RES | -0.0117 |
| 134 C | -7.2985 | -0.6879 | 2.4309 C.ar | 1 RES | -0.1216 |
| 135 C | -8.4814 | -1.4368 | 2.3066 C.ar | 1 RES | -0.1830 |
| 136 H | -9.6654 | -3.0511 | 3.1188 H    | 1 RES | 0.1372  |
| 137 H | -8.0504 | -3.5551 | 4.9435 H    | 1 RES | 0.1458  |
| 138 H | -5.9671 | -2.2387 | 5.1600 H    | 1 RES | 0.1442  |

|       |         |         |             |       |         |
|-------|---------|---------|-------------|-------|---------|
| 139 H | -7.0976 | 0.1013  | 1.7212 H    | 1 RES | 0.1161  |
| 140 H | -9.1784 | -1.2185 | 1.5097 H    | 1 RES | 0.1467  |
| 141 H | -6.1776 | 1.6281  | 3.1569 H    | 1 RES | 0.2917  |
| 142 H | -0.3992 | 1.7708  | 1.1546 H    | 1 RES | 0.0501  |
| 143 H | -1.3025 | 2.2573  | 2.6055 H    | 1 RES | 0.0501  |
| 144 H | -5.7441 | 3.5667  | 6.1037 H    | 1 RES | 0.0581  |
| 145 H | -4.5746 | -0.4918 | 4.4876 H    | 1 RES | 0.1190  |
| 146 H | -6.8695 | 3.1022  | 4.8425 H    | 1 RES | 0.0581  |
| 147 C | -4.1402 | -0.3651 | 2.4091 C.3  | 1 RES | -0.0371 |
| 148 C | -2.3277 | -4.3192 | 2.4524 C.ar | 1 RES | -0.1297 |
| 149 C | -3.3940 | -4.0412 | 1.5803 C.ar | 1 RES | -0.1850 |
| 150 C | -3.9755 | -2.7607 | 1.5612 C.ar | 1 RES | -0.0429 |
| 151 C | -3.5015 | -1.7447 | 2.4135 C.ar | 1 RES | 0.0344  |
| 152 C | -2.4315 | -2.0365 | 3.2826 C.ar | 1 RES | -0.0817 |
| 153 C | -1.8456 | -3.3126 | 3.3049 C.ar | 1 RES | -0.1903 |
| 154 H | -1.8756 | -5.3010 | 2.4637 H    | 1 RES | 0.1356  |
| 155 H | -3.7660 | -4.8096 | 0.9182 H    | 1 RES | 0.1417  |
| 156 H | -4.7941 | -2.5594 | 0.8860 H    | 1 RES | 0.0989  |
| 157 H | -2.0470 | -1.2714 | 3.9370 H    | 1 RES | 0.0747  |
| 158 H | -1.0205 | -3.5089 | 3.9762 H    | 1 RES | 0.1434  |
| 159 H | -2.9551 | 1.1491  | 3.2977 H    | 1 RES | 0.2327  |
| 160 H | -4.6794 | -0.2392 | 1.4683 H    | 1 RES | 0.1560  |

@<TRIPOS>BOND

|    |    |       |
|----|----|-------|
| 1  | 1  | 2 ar  |
| 2  | 1  | 6 ar  |
| 3  | 1  | 48 1  |
| 4  | 2  | 3 ar  |
| 5  | 2  | 7 1   |
| 6  | 3  | 4 ar  |
| 7  | 3  | 8 1   |
| 8  | 4  | 5 ar  |
| 9  | 4  | 47 1  |
| 10 | 5  | 6 ar  |
| 11 | 5  | 9 1   |
| 12 | 6  | 10 1  |
| 13 | 7  | 11 1  |
| 14 | 8  | 15 1  |
| 15 | 8  | 53 1  |
| 16 | 8  | 86 1  |
| 17 | 9  | 37 1  |
| 18 | 9  | 54 1  |
| 19 | 9  | 83 1  |
| 20 | 10 | 12 1  |
| 21 | 11 | 55 1  |
| 22 | 11 | 56 1  |
| 23 | 11 | 57 1  |
| 24 | 12 | 58 1  |
| 25 | 12 | 59 1  |
| 26 | 12 | 60 1  |
| 27 | 13 | 14 ar |
| 28 | 13 | 18 ar |
| 29 | 13 | 52 1  |
| 30 | 14 | 15 ar |
| 31 | 14 | 19 1  |
| 32 | 15 | 16 ar |
| 33 | 16 | 17 ar |
| 34 | 16 | 51 1  |
| 35 | 17 | 18 ar |
| 36 | 17 | 20 1  |
| 37 | 18 | 21 1  |
| 38 | 19 | 22 1  |
| 39 | 20 | 26 1  |
| 40 | 20 | 61 1  |
| 41 | 20 | 126 1 |
| 42 | 21 | 23 1  |
| 43 | 22 | 62 1  |
| 44 | 22 | 63 1  |
| 45 | 22 | 64 1  |
| 46 | 23 | 65 1  |
| 47 | 23 | 66 1  |
| 48 | 23 | 67 1  |
| 49 | 24 | 25 ar |
| 50 | 24 | 29 ar |
| 51 | 24 | 45 1  |
| 52 | 25 | 26 ar |
| 53 | 25 | 30 1  |
| 54 | 26 | 27 ar |
| 55 | 27 | 28 ar |

|     |     |     |    |                            |
|-----|-----|-----|----|----------------------------|
| 56  | 27  | 46  | 1  |                            |
| 57  | 28  | 29  | ar |                            |
| 58  | 28  | 31  | 1  |                            |
| 59  | 29  | 32  | 1  |                            |
| 60  | 30  | 33  | 1  |                            |
| 61  | 31  | 39  | 1  |                            |
| 62  | 31  | 68  | 1  |                            |
| 63  | 31  | 123 | 1  |                            |
| 64  | 32  | 34  | 1  |                            |
| 65  | 33  | 69  | 1  |                            |
| 66  | 33  | 70  | 1  |                            |
| 67  | 33  | 71  | 1  |                            |
| 68  | 34  | 72  | 1  |                            |
| 69  | 34  | 73  | 1  |                            |
| 70  | 34  | 74  | 1  |                            |
| 71  | 35  | 36  | ar |                            |
| 72  | 35  | 40  | ar |                            |
| 73  | 35  | 49  | 1  |                            |
| 74  | 36  | 37  | ar |                            |
| 75  | 36  | 41  | 1  |                            |
| 76  | 37  | 38  | ar |                            |
| 77  | 38  | 39  | ar |                            |
| 78  | 38  | 50  | 1  |                            |
| 79  | 39  | 40  | ar |                            |
| 80  | 40  | 42  | 1  |                            |
| 81  | 41  | 43  | 1  |                            |
| 82  | 42  | 44  | 1  |                            |
| 83  | 43  | 75  | 1  |                            |
| 84  | 43  | 76  | 1  |                            |
| 85  | 43  | 77  | 1  |                            |
| 86  | 44  | 78  | 1  |                            |
| 87  | 44  | 79  | 1  |                            |
| 88  | 44  | 80  | 1  |                            |
| 89  | 81  | 82  | 2  |                            |
| 90  | 81  | 83  | 1  |                            |
| 91  | 81  | 87  | am | BACKBONE   DICT   INTERRES |
| 92  | 83  | 102 | 1  |                            |
| 93  | 83  | 103 | 1  |                            |
| 94  | 84  | 85  | 2  |                            |
| 95  | 84  | 86  | 1  |                            |
| 96  | 84  | 88  | am | BACKBONE   DICT   INTERRES |
| 97  | 86  | 104 | 1  |                            |
| 98  | 86  | 106 | 1  |                            |
| 99  | 87  | 107 | 1  |                            |
| 100 | 87  | 119 | 1  |                            |
| 101 | 88  | 89  | 1  |                            |
| 102 | 88  | 101 | 1  |                            |
| 103 | 89  | 93  | 1  |                            |
| 104 | 89  | 105 | 1  |                            |
| 105 | 89  | 107 | 1  |                            |
| 106 | 90  | 91  | ar |                            |
| 107 | 90  | 95  | ar |                            |
| 108 | 90  | 96  | 1  |                            |
| 109 | 91  | 92  | ar |                            |
| 110 | 91  | 97  | 1  |                            |
| 111 | 92  | 93  | ar |                            |
| 112 | 92  | 98  | 1  |                            |
| 113 | 93  | 94  | ar |                            |
| 114 | 94  | 95  | ar |                            |
| 115 | 94  | 99  | 1  |                            |
| 116 | 95  | 100 | 1  |                            |
| 117 | 107 | 111 | 1  |                            |
| 118 | 107 | 120 | 1  |                            |
| 119 | 108 | 109 | ar |                            |
| 120 | 108 | 113 | ar |                            |
| 121 | 108 | 114 | 1  |                            |
| 122 | 109 | 110 | ar |                            |
| 123 | 109 | 115 | 1  |                            |
| 124 | 110 | 111 | ar |                            |
| 125 | 110 | 116 | 1  |                            |
| 126 | 111 | 112 | ar |                            |
| 127 | 112 | 113 | ar |                            |
| 128 | 112 | 117 | 1  |                            |
| 129 | 113 | 118 | 1  |                            |
| 130 | 121 | 122 | 2  |                            |
| 131 | 121 | 123 | 1  |                            |
| 132 | 121 | 127 | am | BACKBONE   DICT   INTERRES |
| 133 | 123 | 142 | 1  |                            |

```
134 123 143 1
135 124 125 2
136 124 126 1
137 124 128 am BACKBONE | DICT | INTERRES
138 126 144 1
139 126 146 1
140 127 147 1
141 127 159 1
142 128 129 1
143 128 141 1
144 129 133 1
145 129 145 1
146 129 147 1
147 130 131 ar
148 130 135 ar
149 130 136 1
150 131 132 ar
151 131 137 1
152 132 133 ar
153 132 138 1
154 133 134 ar
155 134 135 ar
156 134 139 1
157 135 140 1
158 147 151 1
159 147 160 1
160 148 149 ar
161 148 153 ar
162 148 154 1
163 149 150 ar
164 149 155 1
165 150 151 ar
166 150 156 1
167 151 152 ar
168 152 153 ar
169 152 157 1
170 153 158 1
@<TRIPOS>SUBSTRUCTURE
1 RES 1 GROUP 0 **** 0 ROOT
```

Cartesian coordinates and charges of C (mol2 format).

#Name: C

@<TRIPOS>MOLECULE

catharanthine

49 53 2

SMALL

NO\_CHARGES

@<TRIPOS>ATOM

|    |     |          |          |          |      |   |      |         |
|----|-----|----------|----------|----------|------|---|------|---------|
| 1  | N1  | -5.8096  | -4.3862  | -13.3362 | N.ar | 1 | UNK  | -0.2452 |
| 2  | C2  | -6.6175  | -5.0589  | -12.4346 | C.ar | 1 | UNK  | -0.0700 |
| 3  | C3  | -7.1277  | -4.1587  | -11.5637 | C.ar | 1 | UNK  | -0.1052 |
| 4  | C4  | -6.6010  | -2.8512  | -11.9315 | C.ar | 1 | UNK  | 0.0574  |
| 5  | C5  | -6.7333  | -1.5331  | -11.4402 | C.ar | 1 | UNK  | -0.2130 |
| 6  | C6  | -6.0698  | -0.4504  | -12.0455 | C.ar | 1 | UNK  | -0.1736 |
| 7  | C7  | -5.2511  | -0.6586  | -13.1667 | C.ar | 1 | UNK  | -0.1542 |
| 8  | C8  | -5.0963  | -1.9544  | -13.6823 | C.ar | 1 | UNK  | -0.2437 |
| 9  | C9  | -5.7604  | -3.0305  | -13.0716 | C.ar | 1 | UNK  | 0.1141  |
| 10 | C10 | -8.0720  | -4.4260  | -10.4145 | C.3  | 1 | UNK  | 0.0168  |
| 11 | H11 | -7.3599  | -1.3506  | -10.5806 | H    | 1 | UNK  | 0.1583  |
| 12 | H12 | -6.1918  | 0.5471   | -11.6463 | H    | 1 | UNK  | 0.1360  |
| 13 | H13 | -4.7434  | 0.1762   | -13.6300 | H    | 1 | UNK  | 0.1440  |
| 14 | H14 | -4.4684  | -2.1209  | -14.5449 | H    | 1 | UNK  | 0.1625  |
| 15 | C15 | -6.8457  | -6.5761  | -12.4666 | C.3  | 1 | UNK  | -0.0590 |
| 16 | H16 | -5.3276  | -4.8196  | -14.1120 | H    | 1 | UNK  | 0.2925  |
| 17 | C17 | -7.7348  | -7.1094  | -11.3049 | C.3  | 1 | UNK  | -0.0331 |
| 18 | N18 | -7.1639  | -6.7241  | -10.0065 | N.3  | 1 | UNK  | -0.2636 |
| 19 | C19 | -7.5606  | -5.4388  | -9.3877  | C.3  | 1 | UNK  | 0.1724  |
| 20 | H20 | -8.2409  | -3.4902  | -9.8823  | H    | 1 | UNK  | 0.0233  |
| 21 | H21 | -9.0369  | -4.7373  | -10.8129 | H    | 1 | UNK  | 0.0233  |
| 22 | C22 | -7.6715  | -8.6378  | -11.3249 | C.2  | 1 | UNK  | -0.0942 |
| 23 | C23 | -7.5146  | -6.9001  | -13.8177 | C.2  | 2 | **** | 0.9134  |
| 24 | O24 | -6.6608  | -6.6793  | -14.8292 | O.3  | 2 | **** | -0.4793 |
| 25 | O25 | -8.6465  | -7.2741  | -13.9727 | O.2  | 2 | **** | -0.6640 |
| 26 | C26 | -7.2195  | -6.9298  | -16.1269 | C.3  | 2 | **** | -0.0245 |
| 27 | H27 | -8.3613  | -5.6353  | -8.6741  | H    | 1 | UNK  | 0.0144  |
| 28 | H28 | -7.5415  | -7.9701  | -16.2063 | H    | 2 | **** | 0.0951  |
| 29 | H29 | -8.0786  | -6.2782  | -16.2998 | H    | 2 | **** | 0.0951  |
| 30 | H30 | -6.4668  | -6.7332  | -16.8893 | H    | 2 | **** | 0.0951  |
| 31 | C31 | -5.7291  | -7.1019  | -9.9047  | C.3  | 1 | UNK  | -0.0407 |
| 32 | C32 | -6.4408  | -9.1277  | -11.1748 | C.2  | 1 | UNK  | -0.1847 |
| 33 | C33 | -5.3568  | -8.0648  | -11.0494 | C.3  | 1 | UNK  | 0.0596  |
| 34 | H34 | -6.7186  | -5.0077  | -8.8450  | H    | 1 | UNK  | 0.0144  |
| 35 | H35 | -5.0923  | -6.2182  | -9.9669  | H    | 1 | UNK  | 0.0357  |
| 36 | H36 | -5.5623  | -7.5906  | -8.9442  | H    | 1 | UNK  | 0.0357  |
| 37 | C37 | -5.4512  | -7.2627  | -12.3534 | C.3  | 1 | UNK  | -0.0303 |
| 38 | H38 | -4.6405  | -6.5337  | -12.3698 | H    | 1 | UNK  | 0.0319  |
| 39 | H39 | -5.2892  | -7.9573  | -13.1793 | H    | 1 | UNK  | 0.0319  |
| 40 | H40 | -8.7730  | -6.7997  | -11.4264 | H    | 1 | UNK  | 0.1186  |
| 41 | C41 | -8.9097  | -9.5198  | -11.4792 | C.3  | 1 | UNK  | 0.0315  |
| 42 | C42 | -9.8317  | -9.3602  | -10.2687 | C.3  | 1 | UNK  | -0.0640 |
| 43 | H43 | -9.4477  | -9.2395  | -12.3851 | H    | 1 | UNK  | 0.0329  |
| 44 | H44 | -8.6141  | -10.5666 | -11.5586 | H    | 1 | UNK  | 0.0329  |
| 45 | H45 | -10.1783 | -8.3296  | -10.1906 | H    | 1 | UNK  | 0.0182  |
| 46 | H46 | -10.6946 | -10.0167 | -10.3825 | H    | 1 | UNK  | 0.0182  |
| 47 | H47 | -9.2951  | -9.6298  | -9.3585  | H    | 1 | UNK  | 0.0182  |
| 48 | H48 | -6.2245  | -10.1857 | -11.1480 | H    | 1 | UNK  | 0.1167  |
| 49 | H49 | -4.3661  | -8.5011  | -10.9146 | H    | 1 | UNK  | 0.0527  |

@<TRIPOS>BOND

|    |   |    |    |
|----|---|----|----|
| 1  | 1 | 2  | ar |
| 2  | 1 | 9  | ar |
| 3  | 1 | 16 | 1  |
| 4  | 2 | 3  | ar |
| 5  | 2 | 15 | 1  |
| 6  | 3 | 4  | ar |
| 7  | 3 | 10 | 1  |
| 8  | 4 | 5  | ar |
| 9  | 4 | 9  | ar |
| 10 | 5 | 6  | ar |
| 11 | 5 | 11 | 1  |
| 12 | 6 | 7  | ar |
| 13 | 6 | 12 | 1  |

14 7 8 ar  
15 7 13 1  
16 8 9 ar  
17 8 14 1  
18 10 19 1  
19 10 20 1  
20 10 21 1  
21 15 17 1  
22 15 23 1  
23 15 37 1  
24 17 18 1  
25 17 22 1  
26 17 40 1  
27 18 19 1  
28 18 31 1  
29 19 27 1  
30 19 34 1  
31 22 32 2  
32 22 41 1  
33 23 24 1  
34 23 25 2  
35 24 26 1  
36 26 28 1  
37 26 29 1  
38 26 30 1  
39 31 33 1  
40 31 35 1  
41 31 36 1  
42 32 48 1  
43 32 33 1  
44 33 37 1  
45 33 49 1  
46 37 38 1  
47 37 39 1  
48 41 42 1  
49 41 43 1  
50 41 44 1  
51 42 45 1  
52 42 46 1  
53 42 47 1

@<TRIPOS>SUBSTRUCTURE

|   |      |    |       |   |      |   |      |
|---|------|----|-------|---|------|---|------|
| 1 | UNK  | 1  | GROUP | 0 | **** | 0 | ROOT |
| 2 | **** | 23 | GROUP | 0 | **** | 0 | ROOT |

Cartesian coordinates and charges of protonated catharanthine CH<sup>+</sup> (mol2 format).

#Name: CH<sup>+</sup>

@<TRIPOS>MOLECULE  
protonated catharanthine  
50 54 2  
SMALL  
NO\_CHARGES

@<TRIPOS>ATOM

|    |     |          |         |          |      |   |      |         |
|----|-----|----------|---------|----------|------|---|------|---------|
| 1  | N1  | -10.3743 | 4.9800  | -6.5035  | N.ar | 1 | UNK  | -0.3666 |
| 2  | C2  | -10.6792 | 4.3724  | -7.7116  | C.ar | 1 | UNK  | -0.1968 |
| 3  | C3  | -10.1473 | 5.1171  | -8.7058  | C.ar | 1 | UNK  | -0.0428 |
| 4  | C4  | -9.4919  | 6.2646  | -8.0922  | C.ar | 1 | UNK  | 0.0374  |
| 5  | C5  | -8.7775  | 7.3908  | -8.5596  | C.ar | 1 | UNK  | -0.2243 |
| 6  | C6  | -8.2497  | 8.3476  | -7.6734  | C.ar | 1 | UNK  | -0.1699 |
| 7  | C7  | -8.4225  | 8.2017  | -6.2877  | C.ar | 1 | UNK  | -0.1121 |
| 8  | C8  | -9.1267  | 7.0951  | -5.7886  | C.ar | 1 | UNK  | -0.2825 |
| 9  | C9  | -9.6529  | 6.1462  | -6.6785  | C.ar | 1 | UNK  | 0.2285  |
| 10 | C10 | -10.2003 | 4.8355  | -10.1858 | C.3  | 1 | UNK  | -0.0172 |
| 11 | H11 | -8.6240  | 7.5233  | -9.6197  | H    | 1 | UNK  | 0.1609  |
| 12 | H12 | -7.7037  | 9.1990  | -8.0589  | H    | 1 | UNK  | 0.1606  |
| 13 | H13 | -8.0120  | 8.9380  | -5.6091  | H    | 1 | UNK  | 0.1583  |
| 14 | H14 | -9.2595  | 6.9771  | -4.7233  | H    | 1 | UNK  | 0.1845  |
| 15 | C15 | -11.4906 | 3.0746  | -7.8344  | C.3  | 1 | UNK  | -0.0461 |
| 16 | H16 | -10.6053 | 4.6133  | -5.5881  | H    | 1 | UNK  | 0.3285  |
| 17 | C17 | -11.8150 | 2.6739  | -9.3029  | C.3  | 1 | UNK  | -0.0042 |
| 18 | N18 | -12.5069 | 3.7963  | -10.0680 | N.4  | 1 | UNK  | 0.0143  |
| 19 | C19 | -11.6141 | 4.7544  | -10.7661 | C.3  | 1 | UNK  | -0.0336 |
| 20 | H20 | -9.6803  | 5.6401  | -10.7065 | H    | 1 | UNK  | 0.0597  |
| 21 | H21 | -9.6403  | 3.9231  | -10.3892 | H    | 1 | UNK  | 0.0597  |
| 22 | C22 | -12.9231 | 1.6160  | -9.2801  | C.2  | 1 | UNK  | -0.0920 |
| 23 | C23 | -10.6857 | 1.9350  | -7.1793  | C.2  | 2 | **** | 0.9022  |
| 24 | O24 | -10.5899 | 2.1261  | -5.8571  | O.3  | 2 | **** | -0.4827 |
| 25 | O25 | -10.2001 | 1.0071  | -7.7676  | O.2  | 2 | **** | -0.6471 |
| 26 | C26 | -9.8225  | 1.1197  | -5.1787  | C.3  | 2 | **** | -0.0451 |
| 27 | H27 | -11.5142 | 4.4341  | -11.8045 | H    | 1 | UNK  | 0.0902  |
| 28 | H28 | -8.8016  | 1.0973  | -5.5661  | H    | 2 | **** | 0.1111  |
| 29 | H29 | -9.7901  | 1.3428  | -4.1127  | H    | 2 | **** | 0.1111  |
| 30 | H30 | -10.2746 | 0.1358  | -5.3202  | H    | 2 | **** | 0.1111  |
| 31 | C31 | -13.5227 | 4.4283  | -9.1820  | C.3  | 1 | UNK  | -0.1500 |
| 32 | C32 | -14.0607 | 2.0346  | -8.7215  | C.2  | 1 | UNK  | -0.2289 |
| 33 | C33 | -13.9865 | 3.4276  | -8.1064  | C.3  | 1 | UNK  | -0.0765 |
| 34 | H34 | -12.0588 | 5.7511  | -10.7686 | H    | 1 | UNK  | 0.0902  |
| 35 | H35 | -13.1131 | 5.3084  | -8.6791  | H    | 1 | UNK  | 0.1577  |
| 36 | H36 | -14.3782 | 4.7432  | -9.7821  | H    | 1 | UNK  | 0.1108  |
| 37 | C37 | -12.8401 | 3.3043  | -7.0915  | C.3  | 1 | UNK  | -0.0514 |
| 38 | H38 | -12.8151 | 4.1975  | -6.4671  | H    | 1 | UNK  | 0.0700  |
| 39 | H39 | -13.0616 | 2.4607  | -6.4338  | H    | 1 | UNK  | 0.0395  |
| 40 | H40 | -10.9426 | 2.2696  | -9.8180  | H    | 1 | UNK  | 0.1242  |
| 41 | C41 | -12.7392 | 0.2019  | -9.8339  | C.3  | 1 | UNK  | -0.0012 |
| 42 | C42 | -12.5405 | 0.2230  | -11.3509 | C.3  | 1 | UNK  | -0.0780 |
| 43 | H43 | -11.8715 | -0.2628 | -9.3631  | H    | 1 | UNK  | 0.0524  |
| 44 | H44 | -13.6171 | -0.4050 | -9.6066  | H    | 1 | UNK  | 0.0524  |
| 45 | H45 | -11.6373 | 0.7754  | -11.6095 | H    | 1 | UNK  | 0.0516  |
| 46 | H46 | -12.4393 | -0.8014 | -11.7119 | H    | 1 | UNK  | 0.0516  |
| 47 | H47 | -13.4031 | 0.6835  | -11.8334 | H    | 1 | UNK  | 0.0516  |
| 48 | H48 | -14.9368 | 1.4043  | -8.6215  | H    | 1 | UNK  | 0.1635  |
| 49 | H49 | -14.9196 | 3.7224  | -7.6202  | H    | 1 | UNK  | 0.0940  |
| 50 | H50 | -13.0387 | 3.3289  | -10.7900 | H    | 1 | UNK  | 0.2790  |

@<TRIPOS>BOND

|    |   |    |    |
|----|---|----|----|
| 1  | 1 | 2  | ar |
| 2  | 1 | 9  | ar |
| 3  | 1 | 16 | 1  |
| 4  | 2 | 3  | ar |
| 5  | 2 | 15 | 1  |
| 6  | 3 | 4  | ar |
| 7  | 3 | 10 | 1  |
| 8  | 4 | 5  | ar |
| 9  | 4 | 9  | ar |
| 10 | 5 | 6  | ar |
| 11 | 5 | 11 | 1  |
| 12 | 6 | 7  | ar |
| 13 | 6 | 12 | 1  |
| 14 | 7 | 8  | ar |

```
15 7 13 1
16 8 9 ar
17 8 14 1
18 10 19 1
19 10 20 1
20 10 21 1
21 15 17 1
22 15 23 1
23 15 37 1
24 17 18 1
25 17 22 1
26 17 40 1
27 18 19 1
28 18 31 1
29 18 50 1
30 19 27 1
31 19 34 1
32 22 32 2
33 22 41 1
34 23 24 1
35 23 25 2
36 24 26 1
37 26 28 1
38 26 29 1
39 26 30 1
40 31 33 1
41 31 35 1
42 31 36 1
43 32 48 1
44 32 33 1
45 33 37 1
46 33 49 1
47 37 38 1
48 37 39 1
49 41 42 1
50 41 43 1
51 41 44 1
52 42 45 1
53 42 46 1
54 42 47 1
```

@<TRIPOS>SUBSTRUCTURE

```
1 UNK 1 GROUP 0 **** 0 ROOT
2 **** 23 GROUP 0 **** 0 ROOT
```
